# Supplementary material for: In situ evolution of highly dispersed amorphous CoOxclusters for oxygen evolution reaction
Source: Royal Society of Chemistry journal article supplement (doi:10.1039/c7nr04381c), 2017-01-01
Supplement: c7nr04381c1.pdf [file c7nr04381c1.pdf]

## **In situ Evolution of Highly-dispersed Amorphous CoO<sub>x</sub> Cluster for Oxygen Evolution Reaction**

Dawei Chen<sup>a</sup>, Chung-Li Dong<sup>b</sup>, Yuqin Zou<sup>c,\*</sup>, Dong Su<sup>d,\*</sup>, Yu-Cheng Huang<sup>e</sup>, Li Tao<sup>a</sup>, Shuo Dou<sup>a</sup>,  
Shaohua Shen<sup>f,\*</sup>, and Shuangyin Wang<sup>a,\*</sup>

<sup>a</sup>State Key Laboratory of Chem/Bio-Sensing and Chemometrics, College of Chemistry and Chemical Engineering, Hunan University, Changsha, 410082, P. R. China.

<sup>b</sup> Department of Physics, Tamkang University, Tamsui, 25137, Taiwan.

<sup>c</sup> School of Chemistry, University of Manchester, Great Manchester, United Kingdom

<sup>d</sup>Center for Functional Nanomaterials, Brookhaven National Laboratory, Upton, New York 11973, United States.

<sup>e</sup>Department of Electrophysics, National Chiao Tung University, 101 Hsin-Ann Road, Hsinchu Science Park, Hsinchu 30076, Taiwan.

<sup>f</sup>International Research Center for Renewable Energy, State Key Laboratory of Multiphase Flow in Power Engineering, Xi'an Jiaotong University, Shaanxi 710049, P. R. China.

Correspondence and requests for materials should be addressed to S.W. ([shuangyinwang@hnu.edu.cn](mailto:shuangyinwang@hnu.edu.cn)), D.S. ([dsu@bnl.gov](mailto:dsu@bnl.gov)), S.S. ([shshen\\_xjtu@xjtu.edu.cn](mailto:shshen_xjtu@xjtu.edu.cn)), Y. Z. ([yuqin.zou@postgrad.manchester.ac.uk](mailto:yuqin.zou@postgrad.manchester.ac.uk))

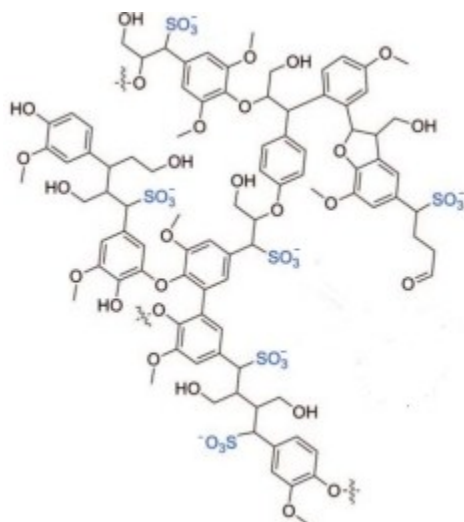

**Figure S1.** Model structural features characteristic of the LS.<sup>[s1]</sup>

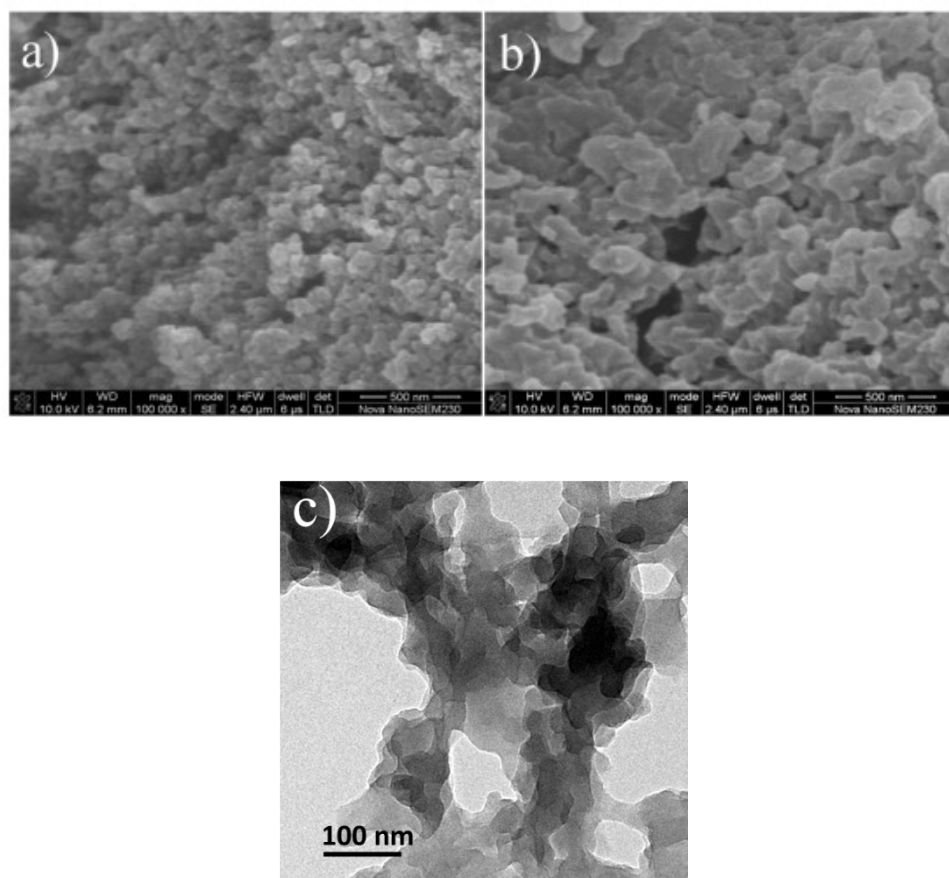

**Figure S2.** SEM images of (a) LS-Co, (b) LS-Co-air, and (c) TEM images of LS-Co.

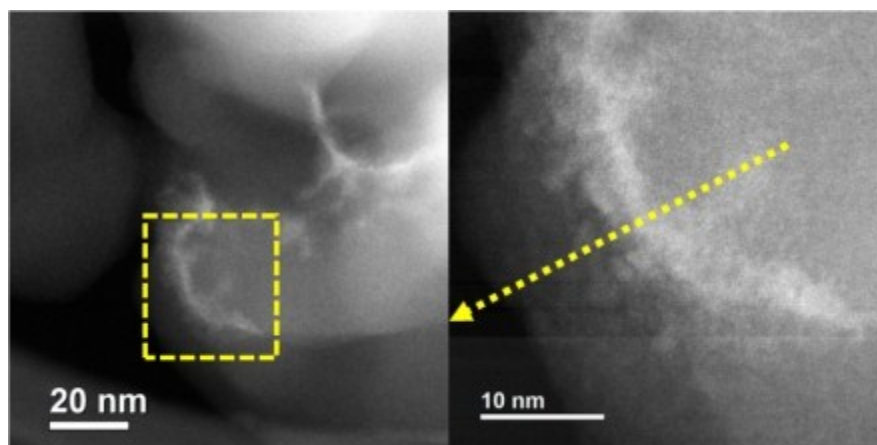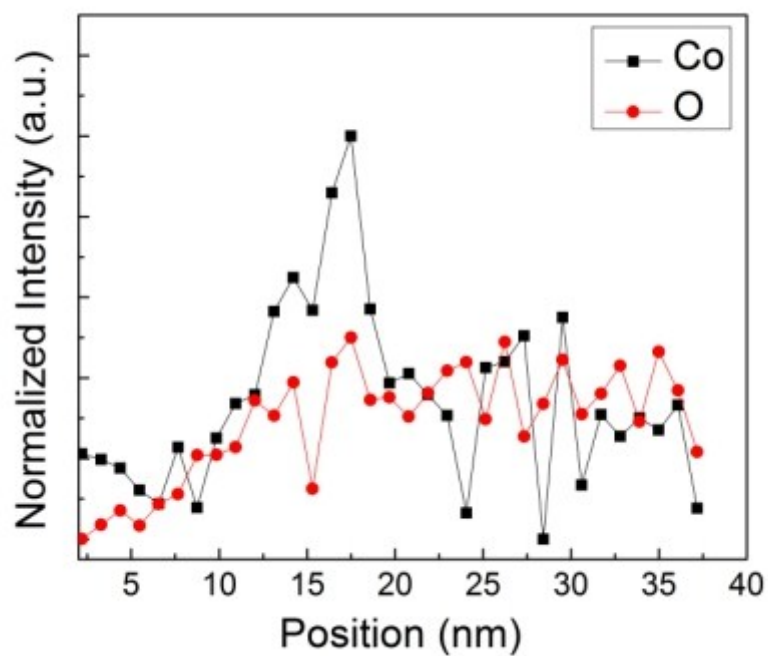

**Figure S3.** (EELS line scan of LS-CoO<sub>x</sub> (indicated by the dashed line in yellow). (a) overall HAADF-STEM image. (b) HAADF-STEM image showing the scanning line. (c) the line scan profiles of Co and O respectively.

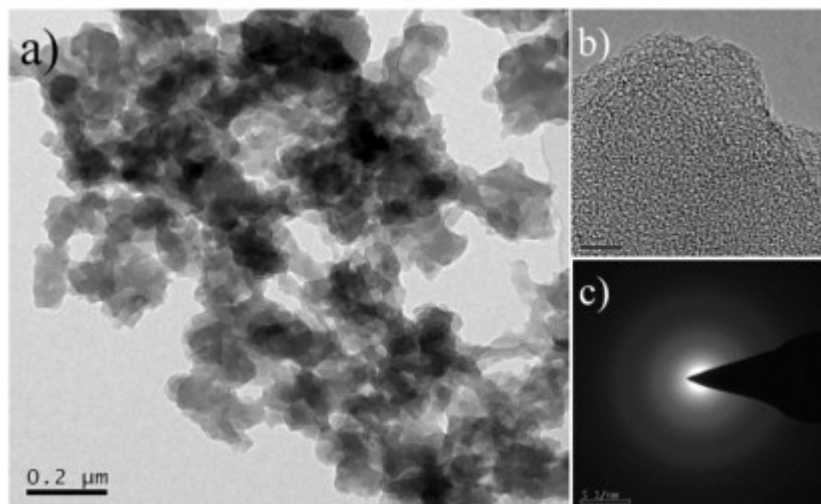

**Figure S4.** (a) TEM image, (b) HRTEM image, and (c) corresponding SAED pattern of LS-Co.

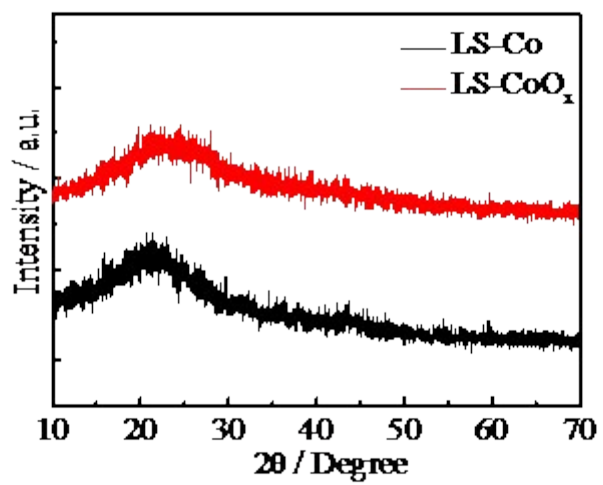

**Figure S5.** XRD patterns of (a) LS-Co and (b) LS-CoO<sub>x</sub>.

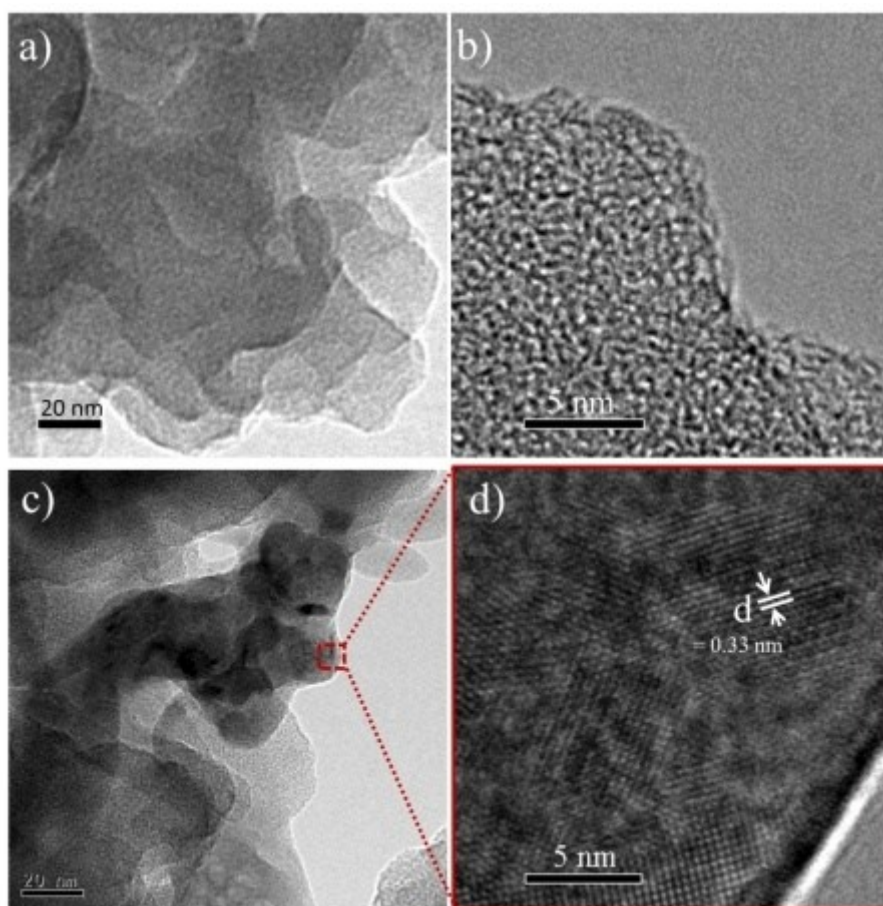

**Figure S6.** TEM images of (a) LS-Co-N<sub>2</sub>, and (c) LS-Co-O<sub>2</sub>, and corresponding HRTEM images of (b) LS-Co-N<sub>2</sub>, and (d) LS-Co-O<sub>2</sub>.

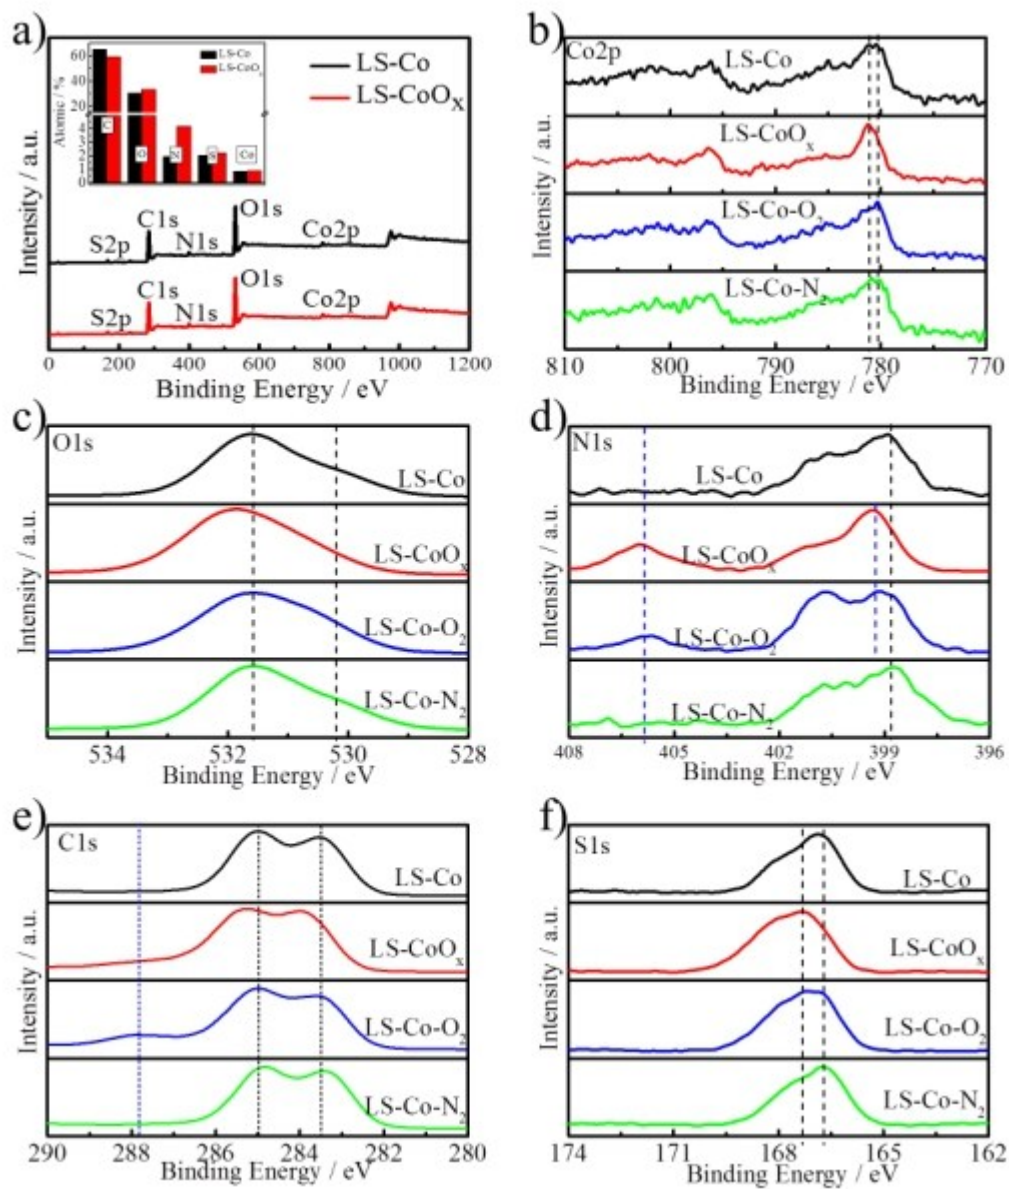

**Figure S7.** (a) Co2p, (b) O1s, (c) N1s, (d) S1s, (e) C1s spectra of LS-Co treated by N<sub>2</sub> DBD-plasma.

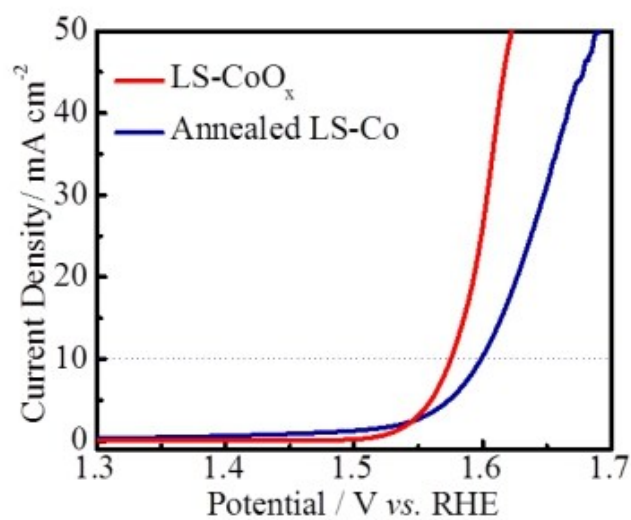

**Figure S8.** LSV polarization curves of the annealed LS-Co and LS-CoO<sub>x</sub> electrocatalysts.

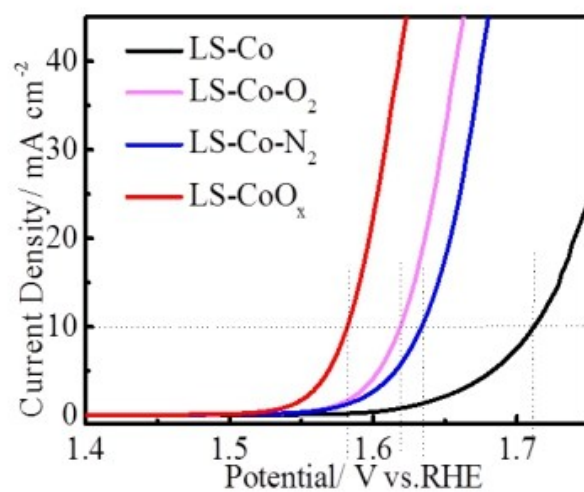

**Figure S9.** LSV polarization curves of the LS-Co, LS-Co-O<sub>2</sub>, LS-Co-N<sub>2</sub>, and LS-CoO<sub>x</sub>.

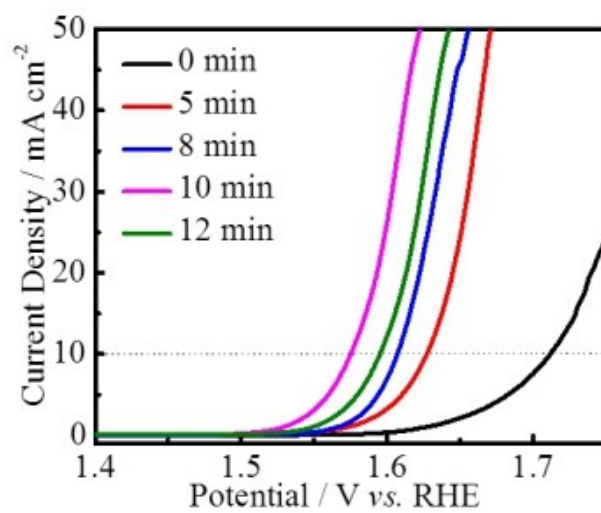

**Figure S10.** LSV polarization curves of the LS-Co electrocatalysts modified by air DBD plasma with different time.



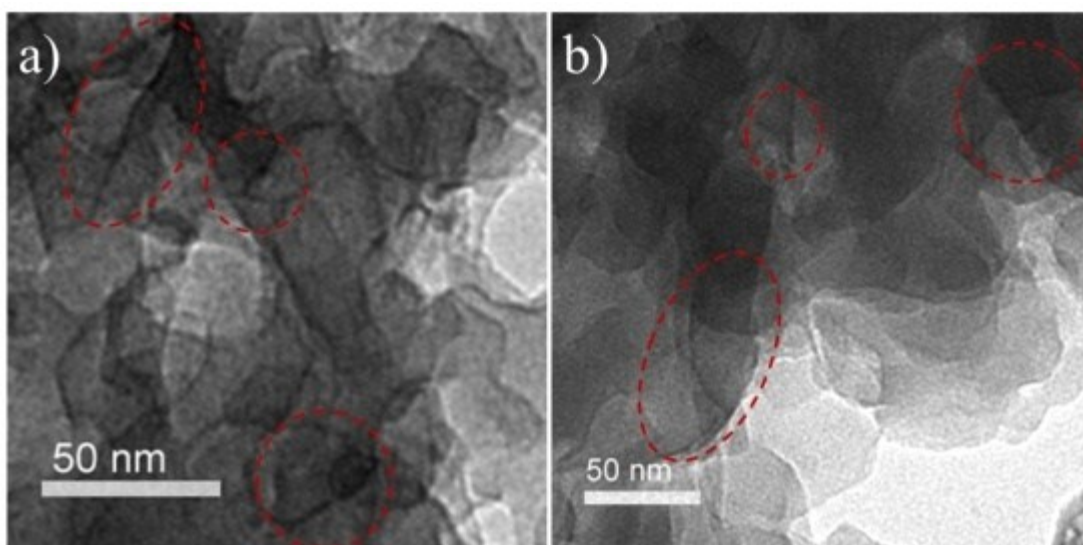

**Figure S11.** TEM images of LS-CoO<sub>x</sub> and after 2000 cycles.

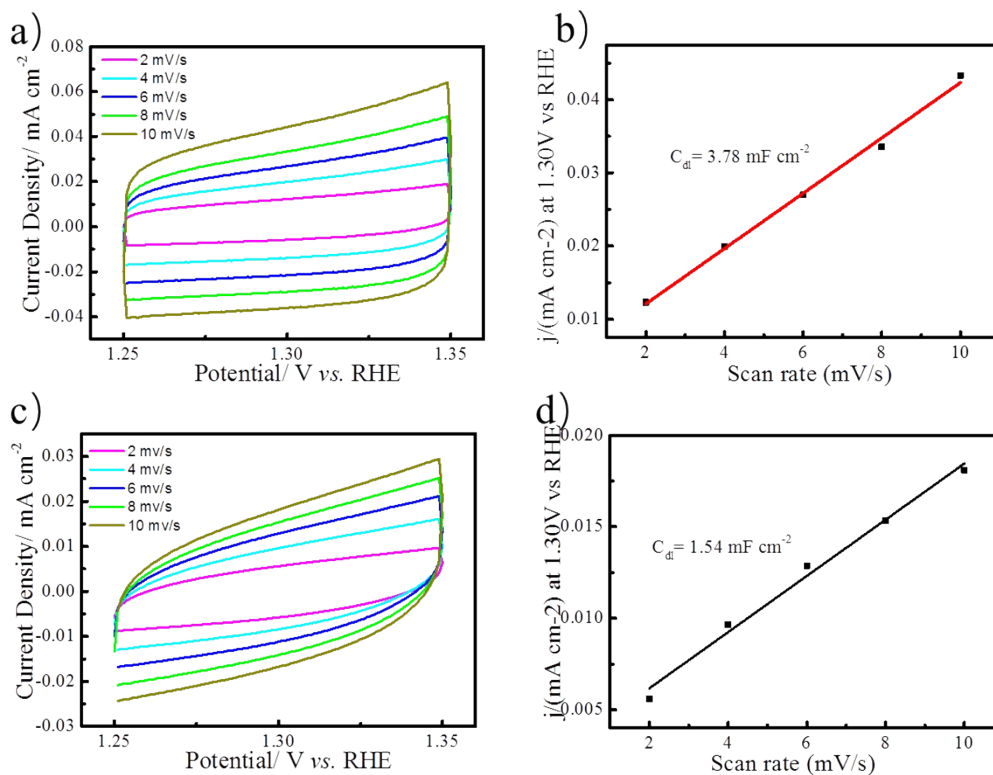

**Figure S12.** Electrochemical surface area (ECSA) tests in 1 M KOH. a) Cyclic voltammetry curves of LS-Co and c) LS-CoO<sub>x</sub> with different scanning rates. The capacitive current measured at 1.30V vs RHE was plotted as a function of scan rate b) LS-Co and d) LS-CoO<sub>x</sub>.

**Table S1.** Comparison of OER activity with recently reported Co-based Oxides catalyst

| Catalysts                                                            | $\eta$ @10 mA<br>cm <sup>-2</sup> | Electrolyte | Electrode | Tafel<br>slope<br>(mV<br>dec <sup>-1</sup> ) | Ref.                                        |
|----------------------------------------------------------------------|-----------------------------------|-------------|-----------|----------------------------------------------|---------------------------------------------|
| LS-CoOx                                                              | 345                               | 1 M KOH     | GC        | 32                                           | This work                                   |
|                                                                      | 290                               | 1 M KOH     | Ni-foam   | /                                            |                                             |
| Co <sub>3</sub> O <sub>4</sub> /N-rmGO                               | 310                               | 1 M KOH     | GC        | 67                                           | <i>Nat. Mater.</i> 2011, 10, 78             |
| CoFeO <sub>x</sub>                                                   | 270                               | 1 M KOH     | GC        | /                                            | <i>J. Am. Chem. Soc.</i> , 2016, 138, 8946. |
| Ni <sub>0.5</sub> Co <sub>0.5</sub> O <sub>x</sub>                   | 355                               | 1 M KOH     | GC        | 35                                           | <i>J. Am. Chem. Soc.</i> 2012, 134, 17253.  |
| Co <sub>3</sub> O <sub>4</sub>                                       | 530                               | 1 M KOH     | GC        | 60                                           | <i>Chemical Science</i> , 2014, 5, 3976     |
| Co <sub>3</sub> O <sub>4</sub>                                       | 328                               | 1 M KOH     | Ni foam   | /                                            | <i>J Phys Chem C</i> , 2009, 113,15068      |
| CoO                                                                  | 330                               | 0.1M KOH    | CFP       | 70                                           | <i>Nat Commun</i> , 2015, 6.                |
| Co <sub>3</sub> O <sub>4-δ</sub>                                     | 390                               | 1 M KOH     | GC        | /                                            | <i>Angew Chem Int Edit</i> , 2015, 54, 7399 |
| ZnCo <sub>3</sub> O <sub>4-δ</sub>                                   | 365                               | 1 M KOH     | GC        | 45                                           | <i>Angew Chem Int Edit</i> , 2015, 54, 7399 |
| NiCo <sub>2</sub> O <sub>4-δ</sub>                                   | 320                               | 1 M KOH     | GC        | 54                                           | <i>Angew Chem Int Edit</i> , 2015, 54, 7399 |
| Li <sub>1-x</sub> CoO <sub>2</sub>                                   | 395                               | 0.1M KOH    | CFP       | 61                                           | <i>Chem Mater</i> , 2014, 26, 1889          |
| Li <sub>1-x</sub> Co <sub>0.5</sub> Fe <sub>0.5</sub> O <sub>2</sub> | 350                               | 0.1M KOH    | CFP       | 51                                           | <i>Chem Mater</i> , 2014, 26, 1889          |
| Co <sub>3</sub> O <sub>4</sub> @CoO SC                               | 430                               | 1 M KOH     | GC        | 89                                           | <i>Nat. Commun.</i> 2015, 6, 8.             |
| Amorphous Ni-Co Binary Oxide Nanoporous Layers                       | 325                               | 1 M KOH     | GC        | 39                                           | <i>ACS Nano</i> 2014, 8, 9518.              |
| Au@Co <sub>3</sub> O <sub>4</sub>                                    | 378                               | 1 M KOH     | GC        | 60                                           | <i>Adv. Mater.</i> 2014, 26, 3950.          |
| Ni-Co oxides layers                                                  | 325                               | 1 M NaOH    | GC        | 39                                           | <i>ACS Nano</i> 2014, 8, 9518.              |
| Co <sub>3</sub> O <sub>4</sub> /NiCo <sub>2</sub> O <sub>4</sub>     | 340                               | 1 M KOH     | GC        | 88                                           | <i>J. Am. Chem. Soc.</i> 2015, 137, 5590.   |

## Reference

[s1] J.Zakzeski, P.C.Bruijninx, A.L.Jongorius, B.M.Weckhuysen, Chem. Rev., 2010, *110*, 3552.
